# Supplementary material for: Real-World Effectiveness and Safety of Ramucirumab as a Second-Line Treatment for Patients with Unresectable Advanced or Metastatic Gastric/Gastroesophageal Junction Adenocarcinoma in Japan and South Korea: A Systematic Literature Review
Source: Springer Nature journal article supplement (doi:10.1007/s12325-024-02838-5), 2024-04-15
Supplement: MOESM1 [file 26980610]

## SUPPLEMENTARY MATERIALS

### **Real-world effectiveness and safety of ramucirumab as a second-line treatment for patients with unresectable advanced or metastatic gastric/gastroesophageal junction adenocarcinoma in Japan and South Korea: a systematic literature review**

Xiaotian Zhang<sup>1</sup>, Li Zhou<sup>2</sup>, Chan Zhou<sup>2</sup>, Lin Shen<sup>1\*</sup>

<sup>1</sup> Peking University Cancer Hospital & Institute, Beijing, China

<sup>2</sup> Eli Lilly and Company, Shanghai, China

\*Corresponding author

Address for corresponding author: Department of Gastrointestinal Oncology, Peking University Cancer Hospital & Institute, No.52 Fucheng Road, Haidian District, Beijing 100142, China

Email addresses for all authors: Xiaotian Zhang (zhangxiaotianmed@163.com); Li Zhou (zhou\_li7@lilly.com); Chan Zhou (zhou\_chan@lilly.com); Lin Shen (linshenpku@163.com)

## Table of contents

|                                                                                                         |    |
|---------------------------------------------------------------------------------------------------------|----|
| Appendix 1 PRISMA 2020 for Abstracts Checklist.....                                                     | 3  |
| Appendix 2 PRISMA 2020 Checklist .....                                                                  | 4  |
| Appendix 3 Search strategies for English databases.....                                                 | 8  |
| Appendix 4 Search strategies for Chinese databases ( <i>original Chinese version</i> ) .....            | 11 |
| Appendix 5 Search strategies for Chinese databases ( <i>translated English version</i> ).....           | 13 |
| Table S1 Risk of bias assessment of controlled studies (NOS assessment tool).....                       | 16 |
| Table S2 Risk of bias assessment of non-controlled studies (NIH assessment tool) .....                  | 18 |
| Table S3 Relative dose intensity (RDI) and duration of treatment (DoT) of RAM or RAM-based therapy..... | 22 |
| Table S4 Treatment discontinuation of RAM or RAM-based therapy .....                                    | 24 |
| Table S5 Post-discontinuation treatment (PDT) distributions.....                                        | 25 |
| Table S6 Overall survival (OS) of patients treated with different regimens .....                        | 26 |
| Table S7 Progression-free survival (PFS) of patients treated with different regimens .....              | 27 |
| Table S8 Objective response rate (ORR) of patients treated with different regimens.....                 | 29 |
| Table S9 Disease control rate (DCR) of patients treated with different regimens .....                   | 31 |
| Table S10 Total adverse events .....                                                                    | 32 |
| Table S11 Five most common adverse events.....                                                          | 33 |

## Appendix 1 PRISMA 2020 for Abstracts Checklist

| Section and Topic       | Item # | Checklist item                                                                                                                                                                                                                                                                                        | Reported (Yes/No) |
|-------------------------|--------|-------------------------------------------------------------------------------------------------------------------------------------------------------------------------------------------------------------------------------------------------------------------------------------------------------|-------------------|
| <b>TITLE</b>            |        |                                                                                                                                                                                                                                                                                                       |                   |
| Title                   | 1      | Identify the report as a systematic review.                                                                                                                                                                                                                                                           | Yes               |
| <b>BACKGROUND</b>       |        |                                                                                                                                                                                                                                                                                                       |                   |
| Objectives              | 2      | Provide an explicit statement of the main objective(s) or question(s) the review addresses.                                                                                                                                                                                                           | Yes               |
| <b>METHODS</b>          |        |                                                                                                                                                                                                                                                                                                       |                   |
| Eligibility criteria    | 3      | Specify the inclusion and exclusion criteria for the review.                                                                                                                                                                                                                                          | Yes               |
| Information sources     | 4      | Specify the information sources (e.g. databases, registers) used to identify studies and the date when each was last searched.                                                                                                                                                                        | Yes               |
| Risk of bias            | 5      | Specify the methods used to assess risk of bias in the included studies.                                                                                                                                                                                                                              | No                |
| Synthesis of results    | 6      | Specify the methods used to present and synthesise results.                                                                                                                                                                                                                                           | No                |
| <b>RESULTS</b>          |        |                                                                                                                                                                                                                                                                                                       |                   |
| Included studies        | 7      | Give the total number of included studies and participants and summarise relevant characteristics of studies.                                                                                                                                                                                         | Yes               |
| Synthesis of results    | 8      | Present results for main outcomes, preferably indicating the number of included studies and participants for each. If meta-analysis was done, report the summary estimate and confidence/credible interval. If comparing groups, indicate the direction of the effect (i.e. which group is favoured). | Yes               |
| <b>DISCUSSION</b>       |        |                                                                                                                                                                                                                                                                                                       |                   |
| Limitations of evidence | 9      | Provide a brief summary of the limitations of the evidence included in the review (e.g. study risk of bias, inconsistency and imprecision).                                                                                                                                                           | No                |
| Interpretation          | 10     | Provide a general interpretation of the results and important implications.                                                                                                                                                                                                                           | Yes               |
| <b>OTHER</b>            |        |                                                                                                                                                                                                                                                                                                       |                   |
| Funding                 | 11     | Specify the primary source of funding for the review.                                                                                                                                                                                                                                                 | No                |
| Registration            | 12     | Provide the register name and registration number.                                                                                                                                                                                                                                                    | Yes               |

From: Page MJ, McKenzie JE, Bossuyt PM, Boutron I, Hoffmann TC, Mulrow CD, et al. The PRISMA 2020 statement: an updated guideline for reporting systematic reviews. *BMJ* 2021;372:n71. doi: 10.1136/bmj.n71

## Appendix 2 PRISMA 2020 Checklist

| Section and Topic       | Item # | Checklist item                                                                                                                                                                                                                                                                                       | Location where item is reported |
|-------------------------|--------|------------------------------------------------------------------------------------------------------------------------------------------------------------------------------------------------------------------------------------------------------------------------------------------------------|---------------------------------|
| <b>TITLE</b>            |        |                                                                                                                                                                                                                                                                                                      |                                 |
| Title                   | 1      | Identify the report as a systematic review.                                                                                                                                                                                                                                                          | Page 1                          |
| <b>ABSTRACT</b>         |        |                                                                                                                                                                                                                                                                                                      |                                 |
| Abstract                | 2      | See the PRISMA 2020 for Abstracts checklist.                                                                                                                                                                                                                                                         | Page 2-3                        |
| <b>INTRODUCTION</b>     |        |                                                                                                                                                                                                                                                                                                      |                                 |
| Rationale               | 3      | Describe the rationale for the review in the context of existing knowledge.                                                                                                                                                                                                                          | Page 4                          |
| Objectives              | 4      | Provide an explicit statement of the objective(s) or question(s) the review addresses.                                                                                                                                                                                                               | Page 4                          |
| <b>METHODS</b>          |        |                                                                                                                                                                                                                                                                                                      |                                 |
| Eligibility criteria    | 5      | Specify the inclusion and exclusion criteria for the review and how studies were grouped for the syntheses.                                                                                                                                                                                          | Page 5                          |
| Information sources     | 6      | Specify all databases, registers, websites, organisations, reference lists and other sources searched or consulted to identify studies. Specify the date when each source was last searched or consulted.                                                                                            | Page 5-6                        |
| Search strategy         | 7      | Present the full search strategies for all databases, registers and websites, including any filters and limits used.                                                                                                                                                                                 | Page 5-6                        |
| Selection process       | 8      | Specify the methods used to decide whether a study met the inclusion criteria of the review, including how many reviewers screened each record and each report retrieved, whether they worked independently, and if applicable, details of automation tools used in the process.                     | Page 6                          |
| Data collection process | 9      | Specify the methods used to collect data from reports, including how many reviewers collected data from each report, whether they worked independently, any processes for obtaining or confirming data from study investigators, and if applicable, details of automation tools used in the process. | Page 6                          |
| Data items              | 10a    | List and define all outcomes for which data were sought. Specify whether all results that were compatible with each outcome domain in each study were sought (e.g. for all measures, time points, analyses), and if not, the methods used to decide which results to collect.                        | Page 6                          |
|                         | 10b    | List and define all other variables for which data were sought (e.g. participant and intervention characteristics, funding sources). Describe any assumptions made about any missing or unclear information.                                                                                         | Page 6                          |

| Section and Topic             | Item # | Checklist item                                                                                                                                                                                                                                                    | Location where item is reported |
|-------------------------------|--------|-------------------------------------------------------------------------------------------------------------------------------------------------------------------------------------------------------------------------------------------------------------------|---------------------------------|
| Study risk of bias assessment | 11     | Specify the methods used to assess risk of bias in the included studies, including details of the tool(s) used, how many reviewers assessed each study and whether they worked independently, and if applicable, details of automation tools used in the process. | Page 6                          |
| Effect measures               | 12     | Specify for each outcome the effect measure(s) (e.g. risk ratio, mean difference) used in the synthesis or presentation of results.                                                                                                                               | Page 6-7                        |
| Synthesis methods             | 13a    | Describe the processes used to decide which studies were eligible for each synthesis (e.g. tabulating the study intervention characteristics and comparing against the planned groups for each synthesis (item #5)).                                              | Page 6-7                        |
|                               | 13b    | Describe any methods required to prepare the data for presentation or synthesis, such as handling of missing summary statistics, or data conversions.                                                                                                             | Page 6-7                        |
|                               | 13c    | Describe any methods used to tabulate or visually display results of individual studies and syntheses.                                                                                                                                                            | Page 6-7                        |
|                               | 13d    | Describe any methods used to synthesize results and provide a rationale for the choice(s). If meta-analysis was performed, describe the model(s), method(s) to identify the presence and extent of statistical heterogeneity, and software package(s) used.       | Not applicable                  |
|                               | 13e    | Describe any methods used to explore possible causes of heterogeneity among study results (e.g. subgroup analysis, meta-regression).                                                                                                                              | Not applicable                  |
|                               | 13f    | Describe any sensitivity analyses conducted to assess robustness of the synthesized results.                                                                                                                                                                      | Not applicable                  |
| Reporting bias assessment     | 14     | Describe any methods used to assess risk of bias due to missing results in a synthesis (arising from reporting biases).                                                                                                                                           | Not applicable                  |
| Certainty assessment          | 15     | Describe any methods used to assess certainty (or confidence) in the body of evidence for an outcome.                                                                                                                                                             | Not applicable                  |
| <b>RESULTS</b>                |        |                                                                                                                                                                                                                                                                   |                                 |
| Study selection               | 16a    | Describe the results of the search and selection process, from the number of records identified in the search to the number of studies included in the review, ideally using a flow diagram.                                                                      | Page 8 and Figure 1             |
|                               | 16b    | Cite studies that might appear to meet the inclusion criteria, but which were excluded, and explain why they were excluded.                                                                                                                                       | Not applicable                  |
| Study characteristics         | 17     | Cite each included study and present its characteristics.                                                                                                                                                                                                         | Page 8 and Table 1              |

| Section and Topic             | Item # | Checklist item                                                                                                                                                                                                                                                                       | Location where item is reported   |
|-------------------------------|--------|--------------------------------------------------------------------------------------------------------------------------------------------------------------------------------------------------------------------------------------------------------------------------------------|-----------------------------------|
| Risk of bias in studies       | 18     | Present assessments of risk of bias for each included study.                                                                                                                                                                                                                         | Page 9                            |
| Results of individual studies | 19     | For all outcomes, present, for each study: (a) summary statistics for each group (where appropriate) and (b) an effect estimate and its precision (e.g. confidence/credible interval), ideally using structured tables or plots.                                                     | Table 1 and Table 2               |
| Results of syntheses          | 20a    | For each synthesis, briefly summarise the characteristics and risk of bias among contributing studies.                                                                                                                                                                               | Table 1                           |
|                               | 20b    | Present results of all statistical syntheses conducted. If meta-analysis was done, present for each the summary estimate and its precision (e.g. confidence/credible interval) and measures of statistical heterogeneity. If comparing groups, describe the direction of the effect. | Page 9-13, Figure 2, and Figure 3 |
|                               | 20c    | Present results of all investigations of possible causes of heterogeneity among study results.                                                                                                                                                                                       | Not applicable                    |
|                               | 20d    | Present results of all sensitivity analyses conducted to assess the robustness of the synthesized results.                                                                                                                                                                           | Page 10                           |
| Reporting biases              | 21     | Present assessments of risk of bias due to missing results (arising from reporting biases) for each synthesis assessed.                                                                                                                                                              | Not applicable                    |
| Certainty of evidence         | 22     | Present assessments of certainty (or confidence) in the body of evidence for each outcome assessed.                                                                                                                                                                                  | Not applicable                    |
| <b>DISCUSSION</b>             |        |                                                                                                                                                                                                                                                                                      |                                   |
| Discussion                    | 23a    | Provide a general interpretation of the results in the context of other evidence.                                                                                                                                                                                                    | Page 14-17                        |
|                               | 23b    | Discuss any limitations of the evidence included in the review.                                                                                                                                                                                                                      | Page 16-17                        |
|                               | 23c    | Discuss any limitations of the review processes used.                                                                                                                                                                                                                                | Page 16-17                        |
|                               | 23d    | Discuss implications of the results for practice, policy, and future research.                                                                                                                                                                                                       | Page 16-17                        |
| <b>OTHER INFORMATION</b>      |        |                                                                                                                                                                                                                                                                                      |                                   |
| Registration and protocol     | 24a    | Provide registration information for the review, including register name and registration number, or state that the review was not registered.                                                                                                                                       | Page 2 and 5                      |
|                               | 24b    | Indicate where the review protocol can be accessed, or state that a protocol was not prepared.                                                                                                                                                                                       | Page 2 and 5                      |

| Section and Topic                              | Item # | Checklist item                                                                                                                                                                                                                             | Location where item is reported |
|------------------------------------------------|--------|--------------------------------------------------------------------------------------------------------------------------------------------------------------------------------------------------------------------------------------------|---------------------------------|
|                                                | 24c    | Describe and explain any amendments to information provided at registration or in the protocol.                                                                                                                                            | Not applicable                  |
| Support                                        | 25     | Describe sources of financial or non-financial support for the review, and the role of the funders or sponsors in the review.                                                                                                              | Page 19                         |
| Competing interests                            | 26     | Declare any competing interests of review authors.                                                                                                                                                                                         | Page 19                         |
| Availability of data, code and other materials | 27     | Report which of the following are publicly available and where they can be found: template data collection forms; data extracted from included studies; data used for all analyses; analytic code; any other materials used in the review. | Page 20                         |

From: Page MJ, McKenzie JE, Bossuyt PM, Boutron I, Hoffmann TC, Mulrow CD, et al. The PRISMA 2020 statement: an updated guideline for reporting systematic reviews. *BMJ* 2021;372:n71. doi: 10.1136/bmj.n71

## Appendix 3 Search strategies for English databases

### PubMed

- #1. "Stomach Neoplasms"[Mesh] OR "Stomach cancer\*"[tw] OR "Stomach adenocarcinoma\*"[tw] OR "gastric cancer\*"[tw] OR "gastric adenocarcinoma\*"[tw] OR "gastroesophageal junction adenocarcinoma\*"[tw] OR "gastroesophageal junction cancer\*"[tw] OR "gastro-oesophageal junction adenocarcinoma\*"[tw] OR "gastro-oesophageal junction cancer\*"[tw] OR GEJC[tw] OR "Stomach tumour\*"[tw] OR "Stomach tumor\*"[tw] OR "gastric tumour\*"[tw] OR "gastric tumor\*"[tw] OR "gastroesophageal junction tumour\*"[tw] OR "gastroesophageal junction tumor\*"[tw] OR "gastro-oesophageal junction tumour\*"[tw] OR "gastro-oesophageal junction tumor\*"[tw]
- #2. Advanced[tw] OR metastatic[tw] OR unresectable[tw] OR Metastas\*[tw]
- #3. #1 AND #2
- #4. "ramucirumab" [Supplementary Concept] OR ramucirumab OR LY3009806 OR Cyramza OR "IMC-1121B" OR IMC1121B
- #5. #3 AND #4
- #6. "Japan"[Mesh] OR "Korea"[Mesh] OR Japan OR Japanese OR Tokyo OR Hokkaido OR Osaka OR Kyoto OR Yokohama OR Nagoya OR Kobe OR Fukuoka OR Sapporo OR Sendai OR Hiroshima OR Korea OR Korean OR Seoul OR Sejong OR Jeju OR Suwon OR Busan OR Daegu OR Incheon OR Gwangju OR Daejeon OR ulsan
- #7. "China"[Mesh] OR "Taiwan"[Mesh] OR China OR Chinese OR Taiwan OR Taiwanese OR "Hong kong" OR Hongkong OR Macau OR Macao OR Beijing OR Shanghai OR Tianjin OR Chongqing OR "Inner Mongolia" OR Tibet OR Guangxi OR Sinkiang OR Ningxia OR Xinjiang OR Hebei OR Shanxi OR Liaoning OR Jilin OR Heilongjiang OR Jiangsu OR Zhejiang OR Anhui OR Fujian OR Jiangxi OR Shandong OR Henan OR Hubei OR Hunan OR Guangdong OR Hainan OR Sichuan OR Guizhou OR Yunnan OR Shaanxi OR Gansu OR Qinghai
- #8. #5 AND (#6 OR #7)

### Embase

- #1. 'stomach cancer'/exp OR (((Stomach OR gastric OR "gastroesophageal junction" OR "gastro-oesophageal junction") NEAR/3 (cancer\* OR adenocarcinoma\* OR tumour\* OR tumor\* OR carcinoma\*)) OR GEJC):ab,ti,kw
- #2. (Advanced OR metastatic OR unresectable OR Metastas\*):ab,ti,kw
- #3. #1 AND #2
- #4. 'ramucirumab'/exp OR (ramucirumab OR LY3009806 OR Cyramza OR "IMC-1121B" OR



IMC1121B):ab,ti,kw

#5. #3 AND #4

#6. 'Japan'/exp OR 'Korea'/exp OR (Japan OR Japanese OR Tokyo OR Hokkaido OR Osaka OR Kyoto OR Yokohama OR Nagoya OR Kobe OR Fukuoka OR Sapporo OR Sendai OR Hiroshima OR Korea OR Korean OR Seoul OR Sejong OR Jeju OR Suwon OR Busan OR Daegu OR Incheon OR Gwangju OR Daejeon OR ulsan):ti,ab,ad,ff

#7. 'China'/exp OR (China OR Chinese OR Taiwan OR "Hong kong" OR Hongkong OR Macau OR Macao OR Beijing OR Shanghai OR Tianjin OR Chongqing OR "Inner Mongolia" OR Tibet OR Guangxi OR Sinkiang OR Ningxia OR Xinjiang OR Hebei OR Shanxi OR Liaoning OR Jilin OR Heilongjiang OR Jiangsu OR Zhejiang OR Anhui OR Fujian OR Jiangxi OR Shandong OR Henan OR Hubei OR Hunan OR Guangdong OR Hainan OR Sichuan OR Guizhou OR Yunnan OR Shaanxi OR Gansu OR Qinghai):ti,ab,ad,ff

#8. #5 AND (#6 OR #7)

### **Cochrane Library**

#1. MeSH descriptor: [Stomach Neoplasms] explode all trees

#2. (((Stomach OR gastric OR "gastroesophageal junction" OR "gastro-oesophageal junction") NEAR/3 (cancer\* OR adenocarcinoma\* OR tumour\* OR tumor\* OR carcinoma\*)) OR GEJC):ti,ab,kw

#3. #1 OR #2

#4. (Advanced OR metastatic OR unresectable OR Metastas\*):ti,ab,kw

#5. #3 AND #4

#6. ramucirumab OR LY3009806 OR Cyramza OR "IMC-1121B" OR IMC1121B

#7. #5 AND #6

#8. MeSH descriptor: [Japan] explode all trees

#9. MeSH descriptor: [Korea] explode all trees

#10. Japan OR Japanese OR Tokyo OR Hokkaido OR Osaka OR Kyoto OR Yokohama OR Nagoya OR Kobe OR Fukuoka OR Sapporo OR Sendai OR Hiroshima OR Korea OR Korean OR Seoul OR Sejong OR Jeju OR Suwon OR Busan OR Daegu OR Incheon OR Gwangju OR Daejeon OR ulsan

#11. MeSH descriptor: [China] explode all trees

#12. China OR Chinese OR Taiwan OR "Hong kong" OR Hongkong OR Macau OR Macao OR Beijing OR Shanghai OR Tianjin OR Chongqing OR "Inner Mongolia" OR Tibet OR Guangxi OR Sinkiang OR Ningxia OR Xinjiang OR Hebei OR Shanxi OR Liaoning OR Jilin OR Heilongjiang OR Jiangsu OR Zhejiang OR Anhui OR Fujian OR Jiangxi OR Shandong OR Henan OR Hubei OR Hunan OR Guangdong OR Hainan OR Sichuan OR Guizhou OR Yunnan OR Shaanxi OR Gansu OR Qinghai

#13. #7 AND (#8 OR #9 OR #10 OR #11 OR #12)

#### Appendix 4 Search strategies for Chinese databases (original Chinese version)

**Note: Pages 11-12 show the original Chinese version of search strategies for Chinese databases, including CNKI, Wanfang, and CBM. The search terms are the Chinese translation of the above terms presented in Appendix 3. Although corresponding search terms were used in Chinese databases as those in English databases, there are still some differences between different retrieval databases in retrieval principles and methods. In this view, the search strategies for Chinese databases will not be the same as those for English databases, just as those in PubMed and Embase are not the same. For translated English version, please refer to Appendix 5 on page 13-15.**

中国知网 (China national knowledge infrastructure, CNKI) (期刊、学位、会议, 中英文扩展: 否)

- #1. (SU%=胃癌+胃腺癌+食管胃癌+食管胃腺癌+食管胃结合部癌+食管胃结合部腺癌+胃食管结合部癌+胃食管结合部腺癌+食管胃交界部癌+食管胃交界部腺癌+食管胃交界癌+食管胃交界腺癌+食管胃交界处癌+食管胃交界处腺癌+胃食管交界部癌+胃食管交界部腺癌+胃食管交界癌+胃食管交界腺癌+胃食管交界腺癌+胃食管交界腺癌 OR TKA=胃癌+胃腺癌+食管胃癌+食管胃腺癌+食管胃结合部癌+食管胃结合部腺癌+胃食管结合部癌+胃食管结合部腺癌+食管胃交界部癌+食管胃交界部腺癌+食管胃交界癌+食管胃交界腺癌+食管胃交界处癌+食管胃交界处腺癌+胃食管交界部癌+胃食管交界部腺癌+胃食管交界癌+胃食管交界腺癌+胃食管交界腺癌+胃食管交界腺癌) AND (SU%=转移+转移性+晚期+局部晚期+局晚期+扩散+中晚期+不可切除+无法切除+不可手术+无法手术 OR TKA=转移+转移性+晚期+局部晚期+局晚期+扩散+中晚期+不可切除+无法切除+不可手术+无法手术)
- #2. #1 AND (SU%=雷莫芦单抗+雷莫卢单抗+雷莫西尤单抗+雷莫西尤+ramucirumab+ Cymaza OR TKA=雷莫芦单抗+雷莫卢单抗+雷莫西尤单抗+雷莫西尤+ramucirumab+ Cymaza)

万方 (Wanfang data knowledge service platform, Wanfang)

- #1. 主题:("胃癌" OR "胃腺癌" OR "食管胃癌" OR "食管胃腺癌" OR "食管胃结合部癌" OR "食管胃结合部腺癌" OR "胃食管结合部癌" OR "胃食管结合部腺癌" OR "食管胃交界部癌" OR "食管胃交界部腺癌" OR "食管胃交界癌" OR "食管胃交界腺癌" OR "食管胃交界处癌" OR "食管胃交界处腺癌" OR "胃食管交界部癌" OR "胃食管交界部腺癌" OR "胃食管交界癌" OR "胃食管交界腺癌" OR "胃食管交界处癌" OR "胃食管交界处腺癌") and 主题:(转移 OR 晚期 OR 局部晚期 OR 局晚期 OR 扩散 OR 中晚期 OR "不可切除" OR "无法切除" OR "不可手术" OR "无法手术")
- #2. #1 and 主题:(雷莫芦单抗 OR 雷莫卢单抗 OR 雷莫西尤单抗 OR 雷莫西尤 OR ramucirumab OR Cymaza)

中国生物医学文献数据库 (China Biology Medicine, CBM)

- #1. ("胃癌"[常用字段:智能] OR "胃腺癌"[常用字段:智能] OR "食管胃癌"[常用字段:智能] OR "食管胃腺癌"[常用字段:智能] OR "食管胃结合部癌"[常用字段:智能] OR "食管胃结合部腺癌"[常用字段:智能] OR "胃食管结合部癌"[常用字段:智能] OR "胃食管结合部腺癌"[常用字段:智能] OR "食管胃交界部癌"[常用字段:智能] OR "食管胃交界部腺癌"[常用字段:智能] OR "食管胃交界处癌"[常用字段:智能] OR "食管胃交界处腺癌"[常用字段:智能] OR "胃食管交界部癌"[常用字段:智能] OR "胃食管交界部腺癌"[常用字段:智能] OR "胃食管交界癌"[常用字段:智能] OR "胃食管交界腺癌"[常用字段:智能] OR "胃食管交界处癌"[常用字段:智能] OR "胃食管交界处腺癌"[常用字段:智能]) AND ("转移"[常用字段:智能] OR "转移性"[常用字段:智能] OR "晚期"[常用字段:智能] OR "局部晚期"[常用字段:智能] OR "局晚期"[常用字段:智能] OR "扩散"[常用字段:智能] OR "中晚期"[常用字段:智能] OR "不可切除"[常用字段:智能] OR "无法切除"[常用字段:智能] OR "不可手术"[常用字段:智能] OR "无法手术"[常用字段:智能])
- #2. #1 AND ("雷莫芦单抗"[常用字段:智能] OR "雷莫卢单抗"[常用字段:智能] OR "雷莫西尤单抗"[常用字段:智能] OR "雷莫西尤"[常用字段:智能] OR "ramucirumab"[常用字段:智能] OR "Cyramza"[常用字段:智能])

## Appendix 5 Search strategies for Chinese databases (*translated English version*)

**Note:** Pages 13-15 show the *translated English version* of search strategies for Chinese databases, including CNKI, Wanfang, and CBM. This is a word-for-word translation. Some recurring terms are due to the situation that some Chinese terms with same or similar meaning but slightly different expressions are corresponding to the same English term. The *translated English version* is for reference purpose only. For the *original Chinese version*, please refer to Appendix 4 on pages 11-12.

**China national knowledge infrastructure (CNKI)** (Journals, degrees, conferences, English and Chinese extensions: No)

- #1. (Topic=Stomach cancer + stomach adenocarcinoma + esophagogastric cancer + esophagogastric adenocarcinoma + esophagogastric junction cancer + esophagogastric junction adenocarcinoma + gastroesophageal junction cancer + gastroesophageal junction adenocarcinoma + esophagogastric junction cancer + esophagogastric junction adenocarcinoma + esophagogastric junction cancer + esophagogastric junction adenocarcinoma + esophagogastric junction cancer + esophagogastric junction adenocarcinoma + gastroesophageal junction cancer + gastroesophageal junction adenocarcinoma + gastroesophageal junction cancer + gastroesophageal junction adenocarcinoma + gastroesophageal junction cancer + gastroesophageal junction adenocarcinoma OR TKA (*abbreviation of "title or keyword or abstract"*)=Stomach cancer + stomach adenocarcinoma + esophagogastric cancer + esophagogastric adenocarcinoma + esophagogastric junction cancer + esophagogastric junction adenocarcinoma + gastroesophageal junction cancer + gastroesophageal junction adenocarcinoma + esophagogastric junction cancer + esophagogastric junction adenocarcinoma + gastroesophageal junction cancer + gastroesophageal junction adenocarcinoma + gastroesophageal junction cancer + gastroesophageal junction adenocarcinoma + gastroesophageal junction cancer + gastroesophageal junction adenocarcinoma) AND (Topic=metastasis + metastatic + advanced + locoregional advanced + locoregional advanced + metastasis + advanced + unresectable + unresectable + unresectable + unresectable OR TKA=metastasis + metastatic + advanced + locoregional advanced + locoregional advanced + metastasis + advanced + unresectable + unresectable + unresectable + unresectable)
- #2. #1 AND (Topic=ramucirumab + ramucirumab + ramucirumab + ramucirumab +ramucirumab+ Cyramza OR TKA=ramucirumab + ramucirumab + ramucirumab + ramucirumab +ramucirumab + Cyramza)

**Wanfang data knowledge service platform (Wanfang)**

- #1. Topic: ("Stomach cancer" OR "stomach adenocarcinoma" OR "esophagogastric cancer" OR "esophagogastric adenocarcinoma" OR "esophagogastric junction cancer" OR "esophagogastric junction adenocarcinoma" OR "gastroesophageal junction cancer" OR "gastroesophageal junction adenocarcinoma" OR "esophagogastric junction cancer" OR "esophagogastric junction adenocarcinoma" OR "esophagogastric junction cancer" OR "esophagogastric junction adenocarcinoma" OR "esophagogastric junction cancer" OR "esophagogastric junction adenocarcinoma" OR "gastroesophageal junction cancer" OR "gastroesophageal junction adenocarcinoma" OR "gastroesophageal junction cancer" OR "gastroesophageal junction adenocarcinoma" OR "gastroesophageal junction cancer" OR "gastroesophageal junction adenocarcinoma") and topic: (metastasis OR advanced OR locoregional advanced OR locoregional advanced OR metastasis OR advanced OR "unresectable" OR "unresectable" OR "unresectable" OR "unresectable")
- #2. #1 and topic: (ramucirumab OR ramucirumab OR ramucirumab OR ramucirumab OR ramucirumab OR Cyramza)

### **China Biology Medicine (CBM)**

- #1. ("Stomach cancer" [common fields: intelligent] OR "stomach adenocarcinoma" [common fields: intelligent] OR "esophagogastric cancer"[common fields: intelligent] OR "esophagogastric adenocarcinoma" [common fields: intelligent] OR "esophagogastric junction cancer" [common fields: intelligent] OR "esophagogastric junction adenocarcinoma" [common fields: intelligent] OR "gastroesophageal junction cancer" [common fields: intelligent] OR "gastroesophageal junction adenocarcinoma" [common fields: intelligent] OR "esophagogastric junction cancer" [common fields: intelligent] OR "esophagogastric junction adenocarcinoma" [common fields: intelligent] OR "esophagogastric junction cancer" [common fields: intelligent] OR "esophagogastric junction adenocarcinoma" [common fields: intelligent] OR "esophagogastric junction cancer" [common fields: intelligent] OR "esophagogastric junction adenocarcinoma" [common fields: intelligent] OR "gastroesophageal junction cancer" [common fields: intelligent] OR "gastroesophageal junction adenocarcinoma" [common fields: intelligent] OR "gastroesophageal junction cancer" [common fields: intelligent] OR "gastroesophageal junction adenocarcinoma" [common fields: intelligent] OR "gastroesophageal junction cancer" [common fields: intelligent] OR "gastroesophageal junction adenocarcinoma" [common fields: intelligent]) AND ("metastasis" [common fields: intelligent] OR "metastatic" [common fields: intelligent] OR "advanced" [common fields: intelligent] OR "locoregional advanced" [common fields: intelligent] OR "locoregional advanced" [common fields: intelligent] OR "metastasis" [common fields: intelligent] OR "advanced" [common fields: intelligent] OR

"unresectable" [common fields: intelligent] OR "unresectable" [common fields: intelligent] OR  
"unresectable" [common fields: intelligent] OR "unresectable" [common fields: intelligent])  
#2. #1 AND ("ramucirumab" [common fields: intelligent] OR "ramucirumab" [common fields: intelligent]  
OR "ramucirumab" [common fields: intelligent] OR "ramucirumab" [common fields: intelligent] OR  
"ramucirumab" [common fields: intelligent] OR "Cyramza" [common fields: intelligent])

**Table S1 Risk of bias assessment of controlled studies (NOS assessment tool)**

| Study ID      |                                                                            | Arai 2021                                                                                                                                                                                                                                                                       | Ishikawa 2020 | Okunaka 2020a | Jung 2018 |      |
|---------------|----------------------------------------------------------------------------|---------------------------------------------------------------------------------------------------------------------------------------------------------------------------------------------------------------------------------------------------------------------------------|---------------|---------------|-----------|------|
| Selection     | Representativeness of the exposed cohort                                   | a) truly representative of the average condition in the community*<br>b) somewhat representative of the average condition in the community*<br>c) selected group of users eg nurses, volunteers<br>d) no description of the derivation of the cohort                            | b1            | b1            | b1        | a1   |
|               | Selection of the non exposed cohort                                        | a) drawn from the same community as the exposed cohort*<br>b) drawn from a different source<br>c) no description of the derivation of the non exposed cohort                                                                                                                    | a1            | a1            | a1        | a1   |
|               | Ascertainment of exposure                                                  | a) secure record (eg surgical records)*<br>b) structured interview*<br>c) written self report<br>d) no description                                                                                                                                                              | a1            | a1            | a1        | a1   |
|               | Demonstration that outcome of interest was not present at start of study   | a) yes*<br>b) no                                                                                                                                                                                                                                                                | a1            | a1            | a1        | a1   |
| Comparability | Comparability of cases and controls on the basis of the design or analysis | a) study controls for age*<br>b) study controls for any additional factor*                                                                                                                                                                                                      | a0b0          | a1b1          | a0b0      | a0b1 |
| Outcome       | Assessment of outcome                                                      | a) independent blind assessment*<br>b) record linkage*<br>c) self report<br>d) no description                                                                                                                                                                                   | d0            | b1            | d0        | b1   |
|               | Was follow-up long enough for outcomes to occur                            | a) yes*<br>b) no                                                                                                                                                                                                                                                                | a1            | a1            | a1        | a1   |
|               | Adequacy of follow up of cohorts                                           | a) complete follow up - all subjects accounted for*<br>b) subjects lost to follow up unlikely to introduce bias-small number lost $\leq$ 20 % follow up, or description provided of those lost)*<br>c) follow up rate > 20% and no description of those lost<br>d) no statement | a1            | a1            | a1        | a1   |
|               |                                                                            | 6                                                                                                                                                                                                                                                                               | 9             | 6             | 8         |      |



**Table S1 Risks of bias assessment of controlled studies (NOS assessment tool) (Continued)**

| Study ID      |                                                                            | Imazeki 2019                                                                                                                                                                                                                                                                 | Masuishi 2018 | Shoji 2018 | Kusumoto 2017 |      |
|---------------|----------------------------------------------------------------------------|------------------------------------------------------------------------------------------------------------------------------------------------------------------------------------------------------------------------------------------------------------------------------|---------------|------------|---------------|------|
| Selection     | Representativeness of the exposed cohort                                   | a) truly representative of the average condition in the community*<br>b) somewhat representative of the average condition in the community*<br>c) selected group of users eg nurses, volunteers<br>d) no description of the derivation of the cohort                         | b1            | b1         | b1            | b1   |
|               | Selection of the non exposed cohort                                        | a) drawn from the same community as the exposed cohort*<br>b) drawn from a different source<br>c) no description of the derivation of the non exposed cohort                                                                                                                 | a1            | a1         | a1            | a1   |
|               | Ascertainment of exposure                                                  | a) secure record (eg surgical records)*<br>b) structured interview*<br>c) written self report<br>d) no description                                                                                                                                                           | a1            | a1         | a1            | a1   |
|               | Demonstration that outcome of interest was not present at start of study   | a) yes*<br>b) no                                                                                                                                                                                                                                                             | a1            | a1         | a1            | a1   |
| Comparability | Comparability of cases and controls on the basis of the design or analysis | a) study controls for age*<br>b) study controls for any additional factor*                                                                                                                                                                                                   | a0b0          | a1b1       | a0b0          | a0b0 |
| Outcome       | Assessment of outcome                                                      | a) independent blind assessment*<br>b) record linkage*<br>c) self report<br>d) no description                                                                                                                                                                                | d0            | b1         | d0            | d0   |
|               | Was follow-up long enough for outcomes to occur                            | a) yes*<br>b) no                                                                                                                                                                                                                                                             | a1            | a1         | a1            | a1   |
|               | Adequacy of follow up of cohorts                                           | a) complete follow up - all subjects accounted for*<br>b) subjects lost to follow up unlikely to introduce bias - small number lost ≤ 20 % follow up, or description provided of those lost)*<br>c) follow up rate > 20% and no description of those lost<br>d) no statement | a1            | a1         | a1            | a1   |
|               |                                                                            | 6                                                                                                                                                                                                                                                                            | 9             | 6          | 6             |      |

Note: A study can be awarded a maximum of one star for each numbered item within the Selection and Outcome categories. A maximum of two stars can be given for Comparability

**Table S2 Risk of bias assessment of non-controlled studies (NIH assessment tool)**

| Study ID                                                                                                                                                                 | Han 2021            | Hashida 2021 | Fukuda 2018 | Kim 2020 | Kashiwada 2019a | Kashiwada 2019b | Kusumoto 2018 | Matsumoto 2017 | Lim 2016 |
|--------------------------------------------------------------------------------------------------------------------------------------------------------------------------|---------------------|--------------|-------------|----------|-----------------|-----------------|---------------|----------------|----------|
| 1. Was the study question or objective clearly stated?                                                                                                                   | Yes                 | Yes          | Yes         | Yes      | Yes             | Yes             | Yes           | Yes            | Yes      |
|                                                                                                                                                                          | No                  |              |             |          |                 |                 |               |                |          |
|                                                                                                                                                                          | Other (CD, NR, NA)* |              |             |          |                 |                 |               |                |          |
| 2. Were eligibility/selection criteria for the study population prespecified and clearly described?                                                                      | Yes                 | Yes          | Yes         | Yes      | Yes             | Yes             |               |                |          |
|                                                                                                                                                                          | No                  |              |             |          |                 |                 |               |                |          |
|                                                                                                                                                                          | Other (CD, NR, NA)* |              |             | NR       |                 |                 | NR            | NR             | NR       |
| 3. Were the participants in the study representative of those who would be eligible for the test/service/intervention in the general or clinical population of interest? | Yes                 | Yes          | Yes         | Yes      | Yes             | Yes             | Yes           | Yes            | Yes      |
|                                                                                                                                                                          | No                  |              |             |          |                 |                 |               |                |          |
|                                                                                                                                                                          | Other (CD, NR, NA)* |              |             |          |                 |                 |               |                |          |
| 4. Were all eligible participants that met the prespecified entry criteria enrolled?                                                                                     | Yes                 | Yes          | Yes         | Yes      |                 |                 |               |                |          |
|                                                                                                                                                                          | No                  |              |             |          |                 |                 |               |                |          |
|                                                                                                                                                                          | Other (CD, NR, NA)* |              |             | NR       |                 | NR              | NR            | NR             | NR       |
| 5. Was the sample size sufficiently large to provide confidence in the findings?                                                                                         | Yes                 |              |             |          |                 |                 |               |                |          |
|                                                                                                                                                                          | No                  |              |             |          |                 |                 |               |                |          |
|                                                                                                                                                                          | Other (CD, NR, NA)* | NR           | NR          | NR       | NR              | NR              | NR            | NR             | NR       |
| 6. Was the test/service/intervention clearly described and delivered consistently across the study population?                                                           | Yes                 | Yes          | Yes         | Yes      |                 |                 |               |                |          |
|                                                                                                                                                                          | No                  |              |             |          |                 |                 |               |                |          |
|                                                                                                                                                                          | Other (CD, NR, NA)* |              |             | NR       |                 | NR              | NR            | NR             | NR       |
| 7. Were the outcome measures prespecified, clearly defined, valid, reliable, and assessed consistently across all study participants?                                    | Yes                 | Yes          | Yes         |          |                 |                 |               |                |          |
|                                                                                                                                                                          | No                  |              |             |          |                 |                 |               |                |          |
|                                                                                                                                                                          | Other (CD, NR, NA)* |              |             | NR       | NR              | NR              | NR            | NR             | NR       |
| 8. Were the people assessing the outcomes blinded to the participants' exposures/interventions?                                                                          | Yes                 |              |             |          |                 |                 |               |                |          |
|                                                                                                                                                                          | No                  |              |             |          |                 |                 |               |                |          |
|                                                                                                                                                                          | Other (CD, NR, NA)* | NR           | NR          |          | NR              | NR              | NR            | NR             | NR       |
| 9. Was the loss to follow-up after baseline 20% or less? Were those lost to follow-up accounted for in the analysis?                                                     | Yes                 | Yes          | Yes         | Yes      | Yes             | Yes             | Yes           | Yes            | Yes      |
|                                                                                                                                                                          | No                  |              |             |          |                 |                 |               |                |          |
|                                                                                                                                                                          | Other (CD, NR, NA)* |              |             |          |                 |                 |               |                |          |

|                                                                                                                                                                                                                             |                        |     |     |     |     |    |    |    |    |    |
|-----------------------------------------------------------------------------------------------------------------------------------------------------------------------------------------------------------------------------|------------------------|-----|-----|-----|-----|----|----|----|----|----|
| 10. Did the statistical methods examine changes in outcome measures from before to after the intervention? Were statistical tests done that provided p values for the pre-to-post changes?                                  | Yes                    | Yes | Yes | Yes | Yes |    |    |    |    |    |
|                                                                                                                                                                                                                             | No                     |     |     |     |     |    |    |    |    |    |
|                                                                                                                                                                                                                             | Other<br>(CD, NR, NA)* |     |     |     |     | NR | NR | NR | NR | NR |
| 11. Were outcome measures of interest taken multiple times before the intervention and multiple times after the intervention (i.e., did they use an interrupted time-series design)?                                        | Yes                    |     | Yes |     | Yes |    |    |    |    |    |
|                                                                                                                                                                                                                             | No                     |     |     |     |     |    |    |    |    |    |
|                                                                                                                                                                                                                             | Other<br>(CD, NR, NA)* | NR  |     | NR  |     | NR | NR | NR | NR | NR |
| 12. If the intervention was conducted at a group level (e.g., a whole hospital, a community, etc.) did the statistical analysis take into account the use of individual-level data to determine effects at the group level? | Yes                    |     |     |     |     |    |    |    |    |    |
|                                                                                                                                                                                                                             | No                     |     |     |     |     |    |    |    |    |    |
|                                                                                                                                                                                                                             | Other<br>(CD, NR, NA)* | NA  | NA  | NA  | NA  | NA | NA | NA | NA | NA |

**Table S2 Risks of bias assessment of non-controlled studies (NIH assessment tool) (Continued)**

| Study ID                                                                                                                                                                 | Sasaki 2020         | Natsume 2019 | Komatsu 2021 | Tozawa 2016 | Sakai 2017 | Shinohara 2016 |
|--------------------------------------------------------------------------------------------------------------------------------------------------------------------------|---------------------|--------------|--------------|-------------|------------|----------------|
| 1. Was the study question or objective clearly stated?                                                                                                                   | Yes                 | Yes          | Yes          | Yes         | Yes        | Yes            |
|                                                                                                                                                                          | No                  |              |              |             |            |                |
|                                                                                                                                                                          | Other (CD, NR, NA)* |              |              |             |            |                |
| 2. Were eligibility/selection criteria for the study population prespecified and clearly described?                                                                      | Yes                 | Yes          | Yes          |             |            |                |
|                                                                                                                                                                          | No                  |              |              |             |            |                |
|                                                                                                                                                                          | Other (CD, NR, NA)* |              | NR           |             | NR         | NR             |
| 3. Were the participants in the study representative of those who would be eligible for the test/service/intervention in the general or clinical population of interest? | Yes                 | Yes          | Yes          | Yes         | Yes        | Yes            |
|                                                                                                                                                                          | No                  |              |              |             |            |                |
|                                                                                                                                                                          | Other (CD, NR, NA)* |              |              |             |            |                |
| 4. Were all eligible participants that met the prespecified entry criteria enrolled?                                                                                     | Yes                 | Yes          | Yes          |             |            |                |
|                                                                                                                                                                          | No                  |              |              |             |            |                |
|                                                                                                                                                                          | Other (CD, NR, NA)* |              | NR           |             | NR         | NR             |
| 5. Was the sample size sufficiently large to provide confidence in the findings?                                                                                         | Yes                 |              |              |             |            |                |
|                                                                                                                                                                          | No                  |              |              |             |            |                |
|                                                                                                                                                                          | Other (CD, NR, NA)* | NR           | NR           | NR          | NR         | NR             |
| 6. Was the test/service/intervention clearly described and delivered consistently across the study population?                                                           | Yes                 | Yes          | Yes          | Yes         |            |                |
|                                                                                                                                                                          | No                  |              |              |             |            |                |
|                                                                                                                                                                          | Other (CD, NR, NA)* |              |              |             | NR         | NR             |
| 7. Were the outcome measures prespecified, clearly defined, valid, reliable, and assessed consistently across all study participants?                                    | Yes                 | Yes          | Yes          | Yes         |            |                |
|                                                                                                                                                                          | No                  |              |              |             |            |                |
|                                                                                                                                                                          | Other (CD, NR, NA)* |              |              |             | NR         | NR             |
| 8. Were the people assessing the outcomes blinded to the participants' exposures/interventions?                                                                          | Yes                 |              |              |             |            |                |
|                                                                                                                                                                          | No                  |              |              |             |            |                |
|                                                                                                                                                                          | Other (CD, NR, NA)* | NR           | NR           | NR          | NR         | NR             |
| 9. Was the loss to follow-up after baseline 20% or less? Were those lost to follow-up accounted for in the analysis?                                                     | Yes                 | Yes          | Yes          | Yes         |            | Yes            |
|                                                                                                                                                                          | No                  |              |              |             |            |                |
|                                                                                                                                                                          | Other (CD, NR, NA)* |              |              |             | NR         | NR             |

|                                                                                                                                                                                                                             |                     |     |     |     |    |    |    |
|-----------------------------------------------------------------------------------------------------------------------------------------------------------------------------------------------------------------------------|---------------------|-----|-----|-----|----|----|----|
| 10. Did the statistical methods examine changes in outcome measures from before to after the intervention? Were statistical tests done that provided p values for the pre-to-post changes?                                  | Yes                 | Yes | Yes | Yes |    |    |    |
|                                                                                                                                                                                                                             | No                  |     |     |     |    |    |    |
|                                                                                                                                                                                                                             | Other (CD, NR, NA)* |     |     |     | NR | NR | NR |
| 11. Were outcome measures of interest taken multiple times before the intervention and multiple times after the intervention (i.e., did they use an interrupted time-series design)?                                        | Yes                 |     |     | Yes |    |    |    |
|                                                                                                                                                                                                                             | No                  |     |     |     |    |    |    |
|                                                                                                                                                                                                                             | Other (CD, NR, NA)* | NR  | NR  |     | NR | NR | NR |
| 12. If the intervention was conducted at a group level (e.g., a whole hospital, a community, etc.) did the statistical analysis take into account the use of individual-level data to determine effects at the group level? | Yes                 |     |     |     |    |    |    |
|                                                                                                                                                                                                                             | No                  |     |     |     |    |    |    |
|                                                                                                                                                                                                                             | Other (CD, NR, NA)* | NA  | NA  | NA  | NA | NA | NA |

\*CD, cannot determine; NA, not applicable; NR, not reported

**Table S3 Relative dose intensity (RDI) and duration of treatment (DoT) of RAM or RAM-based therapy**

| Treatment Regimen | Study ID       | RDI Median (%)                                                  | Dose adjustment                                                                                                                                                                                                                                                      |                                            |                                                      | DoT Median (months)                 |
|-------------------|----------------|-----------------------------------------------------------------|----------------------------------------------------------------------------------------------------------------------------------------------------------------------------------------------------------------------------------------------------------------------|--------------------------------------------|------------------------------------------------------|-------------------------------------|
|                   |                |                                                                 | Event-original, n                                                                                                                                                                                                                                                    | Sample size                                | Proportion (%)                                       |                                     |
| <b>RAM + PTX</b>  | <b>Summary</b> | <b>Range of median:<br/>PTX: 61.3-80.0<br/>RAM: 97.6-100.0</b>  | —                                                                                                                                                                                                                                                                    | <b>Range: 18-1,053</b>                     | <b>Initial:<br/>PTX: 29.7-29.9<br/>RAM: 0.0-10.2</b> | <b>Range of median:<br/>3.2-4.6</b> |
|                   | Ishikawa 2020  | PTX: 80.0 (range: 39.4-100.0)<br>RAM: 100.0 (range: 23.5-100.0) | PTX: due to hematological toxicities: 52<br>RAM: due to fatigue: 1                                                                                                                                                                                                   | 92<br>92                                   | 56.5<br>1.1                                          | 3.2 (range: 0.2-19.8)               |
|                   | Okunaka 2020a  | PTX: 61.3<br>RAM: 97.6                                          | PTX: during treatment, dose reduction or interruption: 98<br>PTX: initial dose reductions: 41<br>RAM: initial dose reductions: 0                                                                                                                                     | 138<br>138                                 | 71.0<br>29.7<br>0.0                                  | —<br>—                              |
|                   | Fukuda 2018    | —                                                               | PTX: dose reductions or delays: 57                                                                                                                                                                                                                                   | 89                                         | 64.0                                                 | 4.6 (range: 0.9-19.3)               |
|                   | Kusumoto 2017  | PTX: 72.4                                                       | —                                                                                                                                                                                                                                                                    | 18                                         | —                                                    | 4.6                                 |
|                   | Han 2021       | —                                                               | After the first dose of RAM + PTX: 443<br>The first dose reduced of PTX: 315<br>The first dose reduced of PTX (ECOG ≥2): 59<br>The first dose reduced of PTX (ECOG 0 or 1): 245<br>The first dose reduced of RAM: 107<br>The first dose reduced of RAM (ECOG ≥2): 21 | 1,044<br>1,053<br>97<br>924<br>1,053<br>97 | 42.4<br>29.9<br>60.8<br>26.5<br>10.2<br>21.6         | —<br>—<br>—<br>—<br>—<br>—          |

The first dose reduced of RAM 924 9.1 —  
(ECOG 0 or 1): 84

| <b>RAM + nab-PTX</b> |                                                                            |                                                                     |                           |                                                                   |                                     |  |
|----------------------|----------------------------------------------------------------------------|---------------------------------------------------------------------|---------------------------|-------------------------------------------------------------------|-------------------------------------|--|
| <b>Summary</b>       | <b>Range of median:<br/>nab-PTX: 57.1-70.7<br/>RAM: 80.2-100.0</b>         | —                                                                   | <b>Range: 35-<br/>113</b> | <b>Initial:<br/>nab-PTX: 47.8<br/>RAM: —</b>                      | <b>Range of median:<br/>2.8-3.2</b> |  |
|                      |                                                                            |                                                                     |                           | <b>During treatment:<br/>nab-PTX: 60.0-<br/>82.3<br/>RAM: 0.0</b> |                                     |  |
| Hashida 2021         | nab-PTX: 59.4 (range:<br>25.9-100.0)<br>RAM: 80.2 (range: 14.3-<br>100.0)  | —                                                                   | 43                        | —                                                                 | 2.8 (range: 0.9-10.1)               |  |
| Ishikawa<br>2020     | nab-PTX: 70.7 (range:<br>33.3-100.0)<br>RAM: 100.0 (range: 10.5-<br>100.0) | nab-PTX: hematological<br>toxicities: 21<br>RAM: 0                  | 35                        | nab-PTX: 60.0<br>RAM: 0.0                                         | 3.2 (range: 0.5-11.0)               |  |
| Okunaka<br>2020a     | nab-PTX: 57.1                                                              | nab-PTX: during treatment,<br>dose reduction or interruption:<br>93 | 113                       | 82.3                                                              | —                                   |  |
|                      |                                                                            | nab-PTX: initial dose<br>reductions: 54                             | 113                       | 47.8                                                              | —                                   |  |
|                      | RAM: 98.2                                                                  | RAM: 0                                                              | 113                       | 0.0                                                               | —                                   |  |
| <b>RAM + taxane</b>  |                                                                            |                                                                     |                           |                                                                   |                                     |  |
| <b>Summary</b>       | —                                                                          | —                                                                   | <b>Range: 3,650</b>       | —                                                                 | <b>Range of median:<br/>3.6</b>     |  |
| Komatsu<br>2021      | —                                                                          | —                                                                   | 3,650                     | —                                                                 | 3.6                                 |  |

Notes: The median value was recalculated as one month equals 30.4 days if the original unit was not month. ECOG=Eastern Cooperative Oncology Group; nab-PTX=albumin-bound paclitaxel; PTX=paclitaxel; RAM=ramucirumab.

**Table S4 Treatment discontinuation of RAM or RAM-based therapy**

| Treatment Regimen    | Study ID       | Sample size           | Proportion of patients with discontinuation (%) | Reason for discontinuation (%) |                           |                             |
|----------------------|----------------|-----------------------|-------------------------------------------------|--------------------------------|---------------------------|-----------------------------|
|                      |                |                       |                                                 | PD (%)                         | AEs (%)                   | Others (%) <sup>a</sup>     |
| <b>RAM</b>           |                |                       |                                                 |                                |                           |                             |
|                      | <b>Summary</b> | <b>Range: 37</b>      | —                                               | <b>Range:</b>                  | <b>Range:</b>             | <b>Range:</b>               |
|                      |                |                       |                                                 | <b>RAM: 76.7</b>               | <b>RAM: 3.3</b>           | <b>RAM: 20.1</b>            |
|                      | Jung 2018      | 37                    | —                                               | RAM: 76.7                      | RAM: 3.3                  | RAM: 20.1                   |
| <b>RAM + PTX</b>     |                |                       |                                                 |                                |                           |                             |
|                      | <b>Summary</b> | <b>Range: 8-1,050</b> | <b>Range: PTX + PTX: 95.0</b>                   | <b>Range:</b>                  | <b>Range:</b>             | <b>Range:</b>               |
|                      |                |                       |                                                 | <b>RAM + PTX: 67.9-76.4</b>    | <b>RAM: 9.7</b>           | <b>RAM + PTX: 17.3-26.9</b> |
|                      |                |                       |                                                 |                                | <b>PTX: 11.8-25.0</b>     |                             |
|                      |                |                       |                                                 |                                | <b>RAM + PTX: 5.3-6.3</b> |                             |
|                      | Ishikawa 2020  | 93                    | —                                               | —                              | RAM: 9.7                  | —                           |
|                      |                |                       |                                                 |                                | PTX: 11.8                 | —                           |
|                      | Shinohara 2016 | 8                     | —                                               | —                              | PTX: 25.0                 | —                           |
|                      | Han 2021       | 1,050                 | RAM + PTX: 95.0                                 | RAM + PTX: 67.9                | RAM + PTX: 5.3            | RAM + PTX: 26.9             |
|                      | Jung 2018      | 228                   | —                                               | RAM + PTX: 76.4                | RAM + PTX: 6.3            | RAM + PTX: 17.3             |
| <b>RAM + nab-PTX</b> |                |                       |                                                 |                                |                           |                             |
|                      | <b>Summary</b> | <b>Range: 35-43</b>   | <b>Range: RAM + nab-PTX: 90.7</b>               | <b>Range:</b>                  | <b>Range:</b>             | <b>Range:</b>               |
|                      |                |                       |                                                 | <b>RAM + nab-PTX: 69.2</b>     | <b>RAM: 8.6</b>           | <b>RAM + nab-PTX: 25.6</b>  |
|                      |                |                       |                                                 |                                | <b>nab-PTX: 8.6</b>       |                             |
|                      |                |                       |                                                 |                                | <b>RAM + nab-PTX: 5.1</b> |                             |
|                      | Hashida 2021   | 43                    | RAM + nab-PTX: 90.7                             | RAM + nab-PTX: 69.2            | RAM + nab-PTX: 5.1        | RAM + nab-PTX: 25.6         |
|                      | Ishikawa 2020  | 35                    | —                                               | —                              | RAM: 8.6                  | —                           |
|                      |                |                       |                                                 |                                | nab-PTX: 8.6              | —                           |

Notes: The percentages of PD, AEs and others are calculated as the number of events divided by the total number of people who discontinued treatment; and the sum of the percentages of PD, AE and Other may not equal 100% due to rounding. <sup>a</sup>: Other includes death, lost to follow-up, patient withdrawal, intervention treatment, general condition or articles categorized as other. AEs=adverse events; nab-PTX=albumin-bound paclitaxel; PD=progressive disease; PTX=paclitaxel; RAM=ramucirumab.



**Table S5 Post-discontinuation treatment (PDT) distributions**

| Treatment Regimen    | Study ID       | Sample size            | 3L therapies       |                   |
|----------------------|----------------|------------------------|--------------------|-------------------|
|                      |                |                        | Treatment category | Number (%)        |
| <b>RAM + PTX</b>     |                |                        |                    |                   |
|                      | <b>Summary</b> | <b>Range: 83-1,055</b> | <b>Range:</b>      |                   |
|                      |                |                        | <b>All</b>         | <b>47.1-57.8%</b> |
|                      |                |                        | <b>CT</b>          | <b>54.2-62.8%</b> |
|                      |                |                        | <b>ICI</b>         | <b>23.3-37.5%</b> |
|                      | Han 2021       | 1,055                  | All                | 497 (47.1)        |
|                      |                |                        | CT                 | 312 (62.8)        |
|                      |                |                        | ICI                | 116 (23.3)        |
|                      |                |                        | Others             | 69 (13.9)         |
|                      | Ishikawa 2020  | 83                     | All                | 48 (57.8)         |
|                      |                |                        | CT                 | 26 (54.2)         |
|                      |                |                        | ICI                | 18 (37.5)         |
|                      |                |                        | Others             | 4 (8.4)           |
| <b>RAM + nab-PTX</b> |                |                        |                    |                   |
|                      | <b>Summary</b> | <b>Range: 28-43</b>    | <b>Range:</b>      |                   |
|                      |                |                        | <b>All</b>         | <b>60.7-74.4%</b> |
|                      |                |                        | <b>CT</b>          | <b>6.9-29.4%</b>  |
|                      |                |                        | <b>ICI</b>         | <b>69.0-70.6%</b> |
|                      | Hashida 2021   | 43                     | All                | 29 (74.4)         |
|                      |                |                        | CT                 | 2 (6.9)           |
|                      |                |                        | ICI                | 20 (69.0)         |
|                      |                |                        | RAM                | 2 (6.9)           |
|                      |                |                        | Others             | 5 (17.2)          |
|                      | Ishikawa 2020  | 28                     | All                | 17 (60.7)         |
|                      |                |                        | CT                 | 5 (29.4)          |
|                      |                |                        | ICI                | 12 (70.6)         |

Notes: Others=Other include radiotherapy, conversion surgery, investigational agents in clinical trials, 5-FU and DDP + RT, or articles categorized as other. 3L therapies=third-line therapies; CT=chemotherapy therapy; ICI=immune checkpoint inhibitor; nab-PTX=albumin-bound paclitaxel; PTX=paclitaxel; RAM=ramucirumab.

**Table S6 Overall survival (OS) of patients treated with different regimens**

| Treatment Regimen    | Study ID        | Total / Subgroup                       | Sample size            | Median (months)        | 95% confidence interval |
|----------------------|-----------------|----------------------------------------|------------------------|------------------------|-------------------------|
| <b>RAM</b>           |                 |                                        |                        |                        |                         |
|                      | <b>Summary</b>  | —                                      | <b>Range: 37</b>       | <b>Range: 6.4</b>      | —                       |
|                      | Jung 2018       | Total                                  | 37                     | 6.4                    | 4.4-8.5                 |
| <b>RAM + PTX</b>     |                 |                                        |                        |                        |                         |
|                      | <b>Summary</b>  | —                                      | <b>Range: 18-1,063</b> | <b>Range: 7.4-12.2</b> | —                       |
|                      | Okunaka 2020a   | Total                                  | 138                    | 10.3                   | 8.5-12.0                |
|                      | Ishikawa 2020   | Total                                  | 93                     | 8.9                    | 7.47-12.00              |
|                      |                 | Patients with peritoneal metastasis    | 62                     | 8.0                    | 6.18-9.67               |
|                      |                 | Patients without peritoneal metastasis | 31                     | 13.9                   | 6.97-NA                 |
|                      | Imazeki 2019    | Total                                  | 91                     | 9.3                    | —                       |
|                      | Kashiwada 2019a | Elderly groups (≥65 years old)         | 24                     | 6.8                    | 4.4-15.5                |
|                      |                 | Nonelderly groups (<65 years old)      | 17                     | 9.3                    | 3.2-17.6                |
|                      | Shoji 2018      | Total                                  | 28                     | 12.2                   | —                       |
|                      | Masuishi 2018   | High ascites group                     | 41                     | 6.2                    | —                       |
|                      |                 | Low ascites group                      | 86                     | 10.6                   | —                       |
|                      | Kusumoto 2018   | Total                                  | 25                     | 9.5                    | —                       |
|                      | Fukuda 2018     | Total                                  | 89                     | 10.4                   | 8.3-13.3                |
|                      | Kusumoto 2017   | Total                                  | 18                     | 9.5                    | —                       |
|                      | Matsumoto 2017  | Total                                  | 37                     | 7.4                    | 5.1-14.1                |
|                      | Han 2021        | Total                                  | 1,063                  | 10.03                  | 9.33-10.73              |
|                      | Kim 2020        | Total                                  | 116                    | 7.76                   | 6.51-11.54              |
|                      | Jung 2018       | Total                                  | 228                    | 8.6                    | 7.7-10.0                |
| <b>RAM + nab-PTX</b> |                 |                                        |                        |                        |                         |
|                      | <b>Summary</b>  | —                                      | <b>Range: 35-113</b>   | <b>Range: 9.8-11.4</b> | —                       |
|                      | Hashida 2021    | Total                                  | 43                     | 9.8                    | 5.9-13.1                |
|                      | Ishikawa 2020   | Total                                  | 35                     | 11.4                   | 7.37-15.23              |
|                      |                 | Patients with peritoneal metastasis    | 31                     | 10.5                   | 5.76-15.23              |
|                      |                 | Patients without peritoneal metastasis | 4                      | 15.1                   | 12.66-NA                |
|                      | Okunaka 2020a   | Total                                  | 113                    | 10.9                   | 9.3-12.7                |

Notes: Studies that reported only subgroup results were not included in the calculation of range value. The median value was recalculated as one month equals 30.4 days if the original unit was not month. NA=not assessable; nab-PTX=albumin-bound paclitaxel; PTX=paclitaxel; RAM=ramucirumab.

**Table S7 Progression-free survival (PFS) of patients treated with different regimens**

| Treatment Regimen    | Study ID        | Total / Subgroup                       | Sample size               | Median (months)        | 95% confidence interval |
|----------------------|-----------------|----------------------------------------|---------------------------|------------------------|-------------------------|
| <b>RAM</b>           |                 |                                        |                           |                        |                         |
|                      | <b>Summary</b>  | —                                      | <b>Range: 37</b>          | <b>Range: 1.8</b>      | —                       |
|                      | Jung 2018       | Total                                  | 37                        | 1.8                    | 1.7-1.9                 |
| <b>RAM + PTX</b>     |                 |                                        |                           |                        |                         |
|                      | <b>Summary</b>  | —                                      | <b>Range: 18-1,063</b>    | <b>Range: 3.35-7.0</b> | —                       |
|                      | Ishikawa 2020   | Total                                  | 93                        | 4.1                    | 3.29-4.61               |
|                      |                 | Patients with peritoneal metastasis    | 62                        | 3.5 <sup>a</sup>       | 2.80-4.31               |
|                      |                 | Patients without peritoneal metastasis | 31                        | 5.7 <sup>a</sup>       | 4.11-9.21               |
|                      | Okunaka 2020a   | Total                                  | 138                       | 3.9                    | 3.1-4.7                 |
|                      | Imazeki 2019    | Total                                  | 91                        | 4.1                    | —                       |
|                      | Kashiwada 2019a | Elderly groups ( $\geq 65$ years old)  | 24                        | 4.9                    | 3.5-10.2                |
|                      |                 | Nonelderly groups ( $< 65$ years old)  | 17                        | 6.3                    | 1.4-NA                  |
|                      | Kusumoto 2018   | Total                                  | 25                        | 4.3                    | —                       |
|                      | Masuishi 2018   | High ascites group                     | PTX + RAM: 41<br>PTX: 63  | 3.5                    | —                       |
|                      |                 | Low ascites group                      | PTX + RAM: 86<br>PTX: 115 | 5.2                    | —                       |
|                      | Fukuda 2018     | Total                                  | 89                        | 5.4                    | 4.1-5.9                 |
|                      | Shoji 2018      | Total                                  | 28                        | 5.1                    | —                       |
|                      | Kusumoto 2017   | Total                                  | 18                        | 4.3                    | —                       |
|                      | Sakai 2017      | Total                                  | 20                        | 7.0                    | —                       |
|                      | Matsumoto 2017  | Total                                  | 37                        | 4.6                    | 3.4-6.7                 |
|                      | Tozawa 2016     | High NLR group (NLR $\geq 2.5$ )       | 8                         | 2.3                    | —                       |
|                      |                 | Low NLR group (NLR $< 2.5$ )           | 12                        | 5.1                    | —                       |
|                      | Han 2021        | Total                                  | 1,063                     | 4.0                    | 3.80-4.27               |
|                      | Kim 2020        | Total                                  | 116                       | 3.35                   | 3.29-4.47               |
|                      | Jung 2018       | Total                                  | 228                       | 3.8                    | 3.4-4.4                 |
|                      | Lim 2016        | Total                                  | 70                        | 4.1                    | 3.3-4.9                 |
| <b>RAM + nab-PTX</b> |                 |                                        |                           |                        |                         |
|                      | <b>Summary</b>  | —                                      | <b>Range: 14-113</b>      | <b>Range: 3.7-7.6</b>  | —                       |
|                      | Hashida 2021    | Total                                  | 43                        | 3.7                    | 2.8-6.2                 |
|                      | Ishikawa 2020   | Total                                  | 35                        | 4.6                    | 3.45-7.99               |
|                      |                 | Patients with peritoneal metastasis    | 4                         | 5.8 <sup>a</sup>       | 3.45-9.21               |
|                      |                 | Patients without peritoneal metastasis | 31                        | 2.4 <sup>a</sup>       | 1.15-NA                 |

|                     |                               |     |                  |          |
|---------------------|-------------------------------|-----|------------------|----------|
| Okunaka 2020a       | Total                         | 113 | 3.9              | 3.4-4.3  |
| Kashiwada 2019b     | Total                         | 14  | 7.6              | 2.1-17.5 |
| <b>RAM + taxane</b> |                               |     |                  |          |
| <b>Summary</b>      |                               |     |                  |          |
| Sasaki 2020         | Anti-PD-1-naive group in 1L   | 110 | 3.4 <sup>b</sup> | 2.9-3.9  |
|                     | Anti-PD-1-exposed group in 1L | 39  | 4.8 <sup>b</sup> | 4.2-5.4  |

Notes: Studies that reported only subgroup results were not included in the calculation of range value. The median value was recalculated as one month equals 30.4 days if the original unit was not month. <sup>a</sup>: RAM + nab-PTX showed longer PFS than RAM + PTX in patients with peritoneal metastasis (median 5.8 months [95% CI 3.45-9.21] vs. median 3.5 months [95% CI 2.80-4.31], univariate Cox proportional hazards model HR 0.66, 95% CI 0.40-1.10; p=0.109), whereas RAM + nab-PTX showed shorter PFS than RAM + PTX in patients without peritoneal metastasis (median 2.4 months [95% CI 1.15-NA] vs. median 5.7 months [95% CI 4.11-9.21], univariate Cox proportional hazards model HR 2.45, 95% CI 0.83 to 7.20; p=0.105). <sup>b</sup>: Median PFS was significantly longer in the anti- PD-1- exposed group than the anti- PD-1- naïve group (median 4.8 months [95% CI 4.2-5.4] vs. median 3.4 months [95% CI 2.9-3.9], univariate Cox proportional hazards model HR 0.56, 95% CI 0.37-0.84, p=0.004; multivariate Cox proportional hazards model HR 0.50, 95% CI 0.32-0.78, p=0.003). NA=not assessable; nab-PTX=albumin-bound paclitaxel; NLR=neutrophil to lymphocyte ratio; PD-1=programmed cell death-1; PTX=paclitaxel; RAM=ramucirumab.

**Table S8 Objective response rate (ORR) of patients treated with different regimens**

| Treatment Regimen    | Study ID        | Total / Subgroup                   | Sample size           | ORR (%)                 |
|----------------------|-----------------|------------------------------------|-----------------------|-------------------------|
| <b>RAM</b>           |                 |                                    |                       |                         |
|                      | <b>Summary</b>  | —                                  | <b>Range: 37</b>      | <b>Range: 5.4</b>       |
|                      | Jung 2018       | Total                              | 37                    | 5.4                     |
| <b>RAM + PTX</b>     |                 |                                    |                       |                         |
|                      | <b>Summary</b>  | —                                  | <b>Range: 4-1,048</b> | <b>Range: 14.5-48.0</b> |
|                      | Ishikawa 2020   | Total                              | 54                    | 20.4                    |
|                      | Okunaka 2020a   | Total                              | 106                   | 27.4                    |
|                      | Imazeki 2019    | Total                              | 55                    | 35.0                    |
|                      | Kusumoto 2018   | Total                              | 25                    | 48.0                    |
|                      |                 | Elderly group (≥75 years old)      | 4                     | 50.0                    |
|                      |                 | Younger group (<75 years old)      | 21                    | 32.0                    |
|                      | Fukuda 2018     | Total                              | 40                    | 40.0                    |
|                      | Shoji 2018      | Total                              | 28                    | 28.0                    |
|                      | Kusumoto 2017   | Total                              | 18                    | 22.0                    |
|                      | Matsumoto 2017  | Total                              | 29                    | 31.0                    |
|                      | Shinohara 2016  | Total                              | 4                     | 25.0                    |
|                      | Han 2021        | Total                              | 1,048                 | 15.1                    |
|                      | Kim 2020        | Total                              | 116                   | 36.3                    |
|                      | Jung 2018       | Total                              | 228                   | 16.6                    |
|                      | Lim 2016        | Total                              | 55                    | 14.5                    |
| <b>RAM + nab-PTX</b> |                 |                                    |                       |                         |
|                      | <b>Summary</b>  | —                                  | <b>Range: 14-83</b>   | <b>Range: 32.4-40.0</b> |
|                      | Hashida 2021    | Total                              | 43                    | 32.4                    |
|                      |                 | Patients with measurable tumors    | 29                    | 32.0                    |
|                      |                 | Patients without measurable tumors | 14                    | 33.3                    |
|                      | Ishikawa 2020   | Total                              | 16                    | 37.5                    |
|                      | Okunaka 2020a   | Total                              | 83                    | 33.7                    |
|                      | Kashiwada 2019b | Total                              | 14                    | 40.0                    |
| <b>RAM + taxane</b>  |                 |                                    |                       |                         |
|                      | <b>Summary</b>  | —                                  | —                     | —                       |
|                      | Sasaki 2020     | Total                              | 118                   | 31.4                    |
|                      |                 | Anti-PD-1-naive group              | 85                    | 20.0 <sup>a</sup>       |
|                      |                 | Anti-PD-1-exposed group            | 33                    | 60.6 <sup>a</sup>       |

Notes: Studies that reported only subgroup results were not included in the calculation of range value. <sup>a</sup>: ORR was significantly higher in the anti- PD-1- exposed group than the anti- PD-1- naïve group (60.6% vs. 20.0%,  $p < 0.001$ , Fisher's exact test or Chi-square test). Notes: nab-PTX=albumin-bound paclitaxel; ORR=objective response rate; PD-1=programmed cell death-1; PTX=paclitaxel; RAM=ramucirumab.

**Table S9 Disease control rate (DCR) of patients treated with different regimens**

| Treatment Regimen    | Study ID        | Total / Subgroup                   | Sample size            | DCR (%)                  |
|----------------------|-----------------|------------------------------------|------------------------|--------------------------|
| <b>RAM</b>           |                 |                                    |                        |                          |
|                      | <b>Summary</b>  | —                                  | <b>Range: 37</b>       | <b>Range: 37.8</b>       |
|                      | Jung 2018       | Total                              | 37                     | 37.8                     |
| <b>RAM + PTX</b>     |                 |                                    |                        |                          |
|                      | <b>Summary</b>  | —                                  | <b>Range: 18-1,048</b> | <b>Range: 56.0-80.3</b>  |
|                      | Okunaka 2020a   | Total                              | 106                    | 67.0                     |
|                      | Imazeki 2019    | Total                              | 55                     | 76.0                     |
|                      | Kusumoto 2018   | Total                              | 25                     | 56.0                     |
|                      |                 | Younger group (<75 years old)      | 21                     | 78.0                     |
|                      |                 | Elderly group (≥75 years old)      | 4                      | 50.0                     |
|                      | Fukuda 2018     | Total                              | 40                     | 63.0                     |
|                      | Kusumoto 2017   | Total                              | 18                     | 78.0                     |
|                      | Han 2021        | Total                              | 1,048                  | 57.7                     |
|                      | Jung 2018       | Total                              | 228                    | 66.3                     |
|                      | Lim 2016        | Total                              | 55                     | 74.5                     |
|                      | Kim 2020        | Total                              | 116                    | 80.3                     |
| <b>RAM + nab-PTX</b> |                 |                                    |                        |                          |
|                      | <b>Summary</b>  | —                                  | <b>Range: 14-83</b>    | <b>Range: 70.2-100.0</b> |
|                      | Hashida 2021    | Total                              | 43                     | 70.2                     |
|                      |                 | Patients with measurable tumors    | 29                     | 64.0                     |
|                      |                 | Patients without measurable tumors | 14                     | 83.3                     |
|                      | Okunaka 2020a   | Total                              | 83                     | 81.9                     |
|                      | Kashiwada 2019b | Total                              | 14                     | 100.0                    |
| <b>RAM + taxane</b>  |                 |                                    |                        |                          |
|                      | <b>Summary</b>  | —                                  | —                      | —                        |
|                      | Sasaki 2020     | Total                              | 118                    | 72.9                     |
|                      |                 | Anti-PD-1-naïve group in 1L        | 85                     | 67.1 <sup>a</sup>        |
|                      |                 | Anti-PD-1-exposed group in 1L      | 33                     | 87.9 <sup>a</sup>        |

Notes: Studies that reported only subgroup results were not included in the calculation of range value. <sup>a</sup>: DCR was significantly higher in the anti- PD-1- exposed group than the anti- PD-1- naïve group (87.9% vs. 67.1%, p=0.023, Fisher's exact test or Chi-square test). DCR=disease control rate; nab-PTX=albumin-bound paclitaxel; PD-1=programmed cell death-1; PTX=paclitaxel; RAM=ramucirumab.

**Table S10 Total adverse events**

| <b>Grade</b>     | <b>Treatment regimen</b> | <b>Study ID</b> | <b>Total / Subgroup</b> | <b>Type of AEs</b> | <b>Sample size</b>   | <b>Proportion (%)</b>   |
|------------------|--------------------------|-----------------|-------------------------|--------------------|----------------------|-------------------------|
| <b>Any grade</b> |                          |                 |                         |                    |                      |                         |
|                  | <b>RAM + PTX</b>         | <b>Summary</b>  | —                       | —                  | <b>Range: 93-138</b> | <b>Range: 97.1-98.0</b> |
|                  |                          | Ishikawa 2020   | Total                   | AE                 | 93                   | 98.0                    |
|                  |                          | Okunaka 2020a   | Total                   | TRAE               | 138                  | 97.1                    |
|                  | <b>RAM + nab-PTX</b>     | <b>Summary</b>  | —                       | —                  | <b>Range: 35-113</b> | <b>Range: 94.0-99.1</b> |
|                  |                          | Ishikawa 2020   | Total                   | AE                 | 35                   | 94.0                    |
|                  |                          | Okunaka 2020a   | Total                   | TRAE               | 113                  | 99.1                    |
| <b>Grade ≥3</b>  |                          |                 |                         |                    |                      |                         |
|                  | <b>RAM + PTX</b>         | <b>Summary</b>  | —                       | —                  | <b>Range: 138</b>    | <b>Range: 63.8</b>      |
|                  |                          | Okunaka 2020a   | Total                   | TRAE               | 138                  | 63.8                    |
|                  | <b>RAM + nab-PTX</b>     | <b>Summary</b>  | —                       | —                  | <b>Range: 113</b>    | <b>Range: 67.3</b>      |
|                  |                          | Okunaka 2020a   | Total                   | TRAE               | 113                  | 67.3                    |

Notes: Okunaka 2020a reported the incidence of grade ≥3 adverse events, and did not report the incidence of grade 5 AEs separately. AEs=adverse events; nab-PTX=albumin-bound paclitaxel; PTX=paclitaxel; RAM=ramucirumab; TRAEs=treatment-related adverse events.



Table S11 Five most common adverse events

| Treatment regimen    | Outcome                   | Study ID       | Total / Subgroup | Type of AEs | Sample size          | Proportion (%)          |
|----------------------|---------------------------|----------------|------------------|-------------|----------------------|-------------------------|
| <b>Any grade</b>     |                           |                |                  |             |                      |                         |
| <b>RAM + PTX</b>     |                           |                |                  |             |                      |                         |
|                      | <b>Leukocytopenia</b>     | <b>Summary</b> | —                | —           | <b>Range: 21-138</b> | <b>Range: 67.0-77.5</b> |
|                      |                           | Arai 2021      | Total            | AE          | 21                   | 67.0                    |
|                      |                           | Okunaka 2020a  | Total            | TRAE        | 138                  | 77.5                    |
|                      | <b>Neutropenia</b>        | <b>Summary</b> | —                | —           | <b>Range: 21-138</b> | <b>Range: 67.0-78.3</b> |
|                      |                           | Arai 2021      | Total            | AE          | 21                   | 67.0                    |
|                      |                           | Okunaka 2020a  | Total            | TRAE        | 138                  | 78.3                    |
|                      |                           | Fukuda 2018    | Total            | TRAE        | 89                   | 70.0                    |
|                      | <b>Anemia</b>             | <b>Summary</b> | —                | —           | <b>Range: 21-138</b> | <b>Range: 31.0-81.2</b> |
|                      |                           | Arai 2021      | Total            | AE          | 21                   | 52.0                    |
|                      |                           | Okunaka 2020a  | Total            | TRAE        | 138                  | 81.2                    |
|                      |                           | Fukuda 2018    | Total            | TRAE        | 89                   | 31.0                    |
|                      | <b>Fatigue</b>            | <b>Summary</b> | —                | —           | <b>Range: 21-138</b> | <b>Range: 23.9-81.0</b> |
|                      |                           | Arai 2021      | Total            | AE          | 21                   | 81.0                    |
|                      |                           | Okunaka 2020a  | Total            | TRAE        | 138                  | 23.9                    |
|                      |                           | Fukuda 2018    | Total            | TRAE        | 89                   | 33.0                    |
|                      | <b>Anorexia</b>           | <b>Summary</b> | —                | —           | <b>Range: 21-138</b> | <b>Range: 17.0-62.0</b> |
|                      |                           | Arai 2021      | Total            | AE          | 21                   | 62.0                    |
|                      |                           | Okunaka 2020a  | Total            | TRAE        | 138                  | 21.0                    |
|                      |                           | Fukuda 2018    | Total            | TRAE        | 89                   | 17.0                    |
| <b>RAM + nab-PTX</b> |                           |                |                  |             |                      |                         |
|                      | <b>Anemia</b>             | <b>Summary</b> | —                | —           | <b>Range: 113</b>    | <b>Range: 92.9</b>      |
|                      |                           | Okunaka 2020a  | Total            | TRAE        | 113                  | 92.9                    |
|                      | <b>Neutropenia</b>        | <b>Summary</b> | —                | —           | <b>Range: 113</b>    | <b>Range: 80.5</b>      |
|                      |                           | Okunaka 2020a  | Total            | TRAE        | 113                  | 80.5                    |
|                      | <b>Leukopenia</b>         | <b>Summary</b> | —                | —           | <b>Range: 113</b>    | <b>Range: 75.2</b>      |
|                      |                           | Okunaka 2020a  | Total            | TRAE        | 113                  | 75.2                    |
|                      | <b>Sensory neuropathy</b> | <b>Summary</b> | —                | —           | <b>Range: 113</b>    | <b>Range: 63.7</b>      |
|                      |                           | Okunaka 2020a  | Total            | TRAE        | 113                  | 63.7                    |
|                      | <b>Thrombocytopenia</b>   | <b>Summary</b> | —                | —           | <b>Range: 113</b>    | <b>Range: 38.1</b>      |
|                      |                           | Okunaka 2020a  | Total            | TRAE        | 113                  | 38.1                    |
| <b>RAM + taxane</b>  |                           |                |                  |             |                      |                         |
|                      | <b>Neutropenia</b>        | <b>Summary</b> | —                | —           | <b>Range: 149</b>    | <b>Range: 83.9</b>      |

|                                      |                |       |      |                        |                         |
|--------------------------------------|----------------|-------|------|------------------------|-------------------------|
|                                      | Sasaki 2020    | —     | TRAE | 149                    | 83.9                    |
| <b>Leukocytopenia</b>                | <b>Summary</b> | —     | —    | <b>Range: 149</b>      | <b>Range: 81.9</b>      |
|                                      | Sasaki 2020    | —     | TRAE | 149                    | 81.9                    |
| <b>Anemia</b>                        | <b>Summary</b> | —     | —    | <b>Range: 149</b>      | <b>Range: 67.1</b>      |
|                                      | Sasaki 2020    | —     | TRAE | 149                    | 67.1                    |
| <b>Peripheral sensory neuropathy</b> | <b>Summary</b> | —     | —    | <b>Range: 149</b>      | <b>Range: 56.4</b>      |
|                                      | Sasaki 2020    | —     | TRAE | 149                    | 56.4                    |
| <b>Decreased appetite</b>            | <b>Summary</b> | —     | —    | <b>Range: 149</b>      | <b>Range: 30.2</b>      |
|                                      | Sasaki 2020    | —     | TRAE | 149                    | 30.2                    |
| <hr/>                                |                |       |      |                        |                         |
| <b>Grade ≥3</b>                      |                |       |      |                        |                         |
| <hr/>                                |                |       |      |                        |                         |
| <b>RAM + PTX</b>                     |                |       |      |                        |                         |
| <hr/>                                |                |       |      |                        |                         |
| <b>Neutropenia</b>                   | <b>Summary</b> | —     | —    | <b>Range: 21-1,051</b> | <b>Range: 33.0-55.1</b> |
|                                      | Arai 2021      | Total | AE   | 21                     | 33.0                    |
|                                      | Han 2021       | Total | TRAE | 1,051                  | 35.3                    |
|                                      | Okunaka 2020a  | Total | TRAE | 138                    | 55.1                    |
|                                      | Ishikawa 2020  | Total | AE   | 93                     | 48.4                    |
|                                      | Fukuda 2018    | Total | TRAE | 89                     | 39.0                    |
|                                      | Jung 2018      | Total | TRAE | 228                    | 46.9                    |
|                                      | Imazeki 2019   | Total | AE   | 91                     | 55.0                    |
|                                      | Matsumoto 2017 | Total | AE   | 37                     | 46.0                    |
| <b>Leucopenia</b>                    | <b>Summary</b> | —     | —    | <b>Range: 21-138</b>   | <b>Range: 27.0-34.8</b> |
|                                      | Arai 2021      | Total | AE   | 21                     | 29.0                    |
|                                      | Okunaka 2020a  | Total | TRAE | 138                    | 34.8                    |
|                                      | Ishikawa 2020  | Total | AE   | 93                     | 30.1                    |
|                                      | Imazeki 2019   | Total | AE   | 91                     | 31.0                    |
|                                      | Matsumoto 2017 | Total | AE   | 37                     | 27.0                    |
| <b>Anemia</b>                        | <b>Summary</b> | —     | —    | <b>Range: 21-1,051</b> | <b>Range: 0.0-22.0</b>  |
|                                      | Arai 2021      | Total | AE   | 21                     | 5.0                     |
|                                      | Han 2021       | Total | TRAE | 1,051                  | 10.5                    |
|                                      | Okunaka 2020a  | Total | TRAE | 138                    | 13.8                    |
|                                      | Ishikawa 2020  | Total | AE   | 93                     | 2.2                     |
|                                      | Fukuda 2018    | Total | TRAE | 89                     | 0.0                     |
|                                      | Jung 2018      | Total | TRAE | 228                    | 13.6                    |
|                                      | Matsumoto 2017 | Total | AE   | 37                     | 22.0                    |
| <b>Febrile neutropenia</b>           | <b>Summary</b> | —     | —    | <b>Range: 21-1,054</b> | <b>Range: 1.0-14.0</b>  |
|                                      | Arai 2021      | Total | AE   | 21                     | 14.0                    |

|                                     |                 |       |      |                       |                         |
|-------------------------------------|-----------------|-------|------|-----------------------|-------------------------|
|                                     | Han 2021        | Total | TRAE | 1,054                 | 4.5                     |
|                                     | Okunaka 2020a   | Total | TRAE | 138                   | 9.4                     |
|                                     | Ishikawa 2020   | Total | AE   | 93                    | 5.4                     |
|                                     | Fukuda 2018     | Total | TRAE | 89                    | 1.0                     |
|                                     | Jung 2018       | Total | TRAE | 228                   | 7.0                     |
| <b>Gastrointestinal perforation</b> | <b>Summary</b>  | —     | —    | <b>Range: 8-1,051</b> | <b>Range: 0.6-12.5</b>  |
|                                     | Arai 2021       | Total | AE   | 21                    | 10.0                    |
|                                     | Han 2021        | Total | TRAE | 1,051                 | 0.6                     |
|                                     | Ishikawa 2020   | Total | AE   | 93                    | 1.1                     |
|                                     | Fukuda 2018     | Total | TRAE | 89                    | 1.0                     |
|                                     | Jung 2018       | Total | TRAE | 228                   | 3.1                     |
|                                     | Shinohara 2016  | Total | AE   | 8                     | 12.5                    |
| <b>RAM + nab-PTX</b>                |                 |       |      |                       |                         |
| <b>Neutropenia</b>                  | <b>Summary</b>  | —     | —    | <b>Range: 14-113</b>  | <b>Range: 53.5-60.0</b> |
|                                     | Hashida 2021    | Total | AE   | 43                    | 53.5                    |
|                                     | Okunaka 2020a   | Total | TRAE | 113                   | 56.6                    |
|                                     | Ishikawa 2020   | Total | AE   | 35                    | 54.3                    |
|                                     | Kashiwada 2019b | Total | TRAE | 14                    | 60.0                    |
| <b>Leucopenia</b>                   | <b>Summary</b>  | —     | —    | <b>Range: 35-113</b>  | <b>Range: 25.7-30.2</b> |
|                                     | Hashida 2021    | Total | AE   | 43                    | 30.2                    |
|                                     | Okunaka 2020a   | Total | TRAE | 113                   | 30.1                    |
|                                     | Ishikawa 2020   | Total | AE   | 35                    | 25.7                    |
| <b>Hypertension</b>                 | <b>Summary</b>  | —     | —    | <b>Range: 14-113</b>  | <b>Range: 0.0-26.0</b>  |
|                                     | Hashida 2021    | Total | AE   | 43                    | 0.0                     |
|                                     | Okunaka 2020a   | Total | TRAE | 113                   | 13.3                    |
|                                     | Ishikawa 2020   | Total | AE   | 35                    | 5.7                     |
|                                     | Kashiwada 2019b | Total | TRAE | 14                    | 26.0                    |
| <b>Appetite loss</b>                | <b>Summary</b>  | —     | —    | <b>Range: 43</b>      | <b>Range: 9.3</b>       |
|                                     | Hashida 2021    | Total | AE   | 43                    | 9.3                     |
| <b>Anemia</b>                       | <b>Summary</b>  | —     | —    | <b>Range: 35-113</b>  | <b>Range: 0.0-7.1</b>   |
|                                     | Hashida 2021    | Total | AE   | 43                    | 4.7                     |
|                                     | Okunaka 2020a   | Total | TRAE | 113                   | 7.1                     |
|                                     | Ishikawa 2020   | Total | AE   | 35                    | 0.0                     |
| <b>RAM</b>                          |                 |       |      |                       |                         |
| <b>Anemia</b>                       | <b>Summary</b>  | —     | —    | <b>Range: 37</b>      | <b>Range: 13.5</b>      |
|                                     | Jung 2018       | Total | TRAE | 37                    | 13.5                    |

|                            |                |       |      |                  |                   |
|----------------------------|----------------|-------|------|------------------|-------------------|
| <b>Neutropenia</b>         | <b>Summary</b> | —     | —    | <b>Range: 37</b> | <b>Range: 8.1</b> |
|                            | Jung 2018      | Total | TRAE | 37               | 8.1               |
| <b>Vomiting</b>            | <b>Summary</b> | —     | —    | <b>Range: 37</b> | <b>Range: 5.4</b> |
|                            | Jung 2018      | Total | TRAE | 37               | 5.4               |
| <b>Diarrhea</b>            | <b>Summary</b> | —     | —    | <b>Range: 37</b> | <b>Range: 5.4</b> |
|                            | Jung 2018      | Total | TRAE | 37               | 5.4               |
| <b>Febrile neutropenia</b> | <b>Summary</b> | —     | —    | <b>Range: 37</b> | <b>Range: 2.7</b> |
|                            | Jung 2018      | Total | TRAE | 37               | 2.7               |

---

Notes: The wording of AEs and TRAEs used in the primary studies were not differentiate when summarizing the five most common AEs. Han 2021 reported that six patients experienced febrile neutropenias (Grade 5). No one experienced a Grade 5 adverse event in Hashida 2021, Kashiwada 2019b and Jung 2018. Okunaka 2020a, Fukuda 2018 and Ishikawa 2020 reported the incidence of grade  $\geq 3$  adverse events, and did not report the incidence of grade 5 AEs separately. AEs=adverse events; nab-PTX=albumin-bound paclitaxel; PTX=paclitaxel; RAM=ramucirumab; TRAEs=treatment-related adverse events.
